# Supplementary material for: Enhanced PEMFC performance through high O2 permeation and proton conductive electrospun nanofiber electrodes with unique ionomer construction
Source: Royal Society of Chemistry journal article supplement (doi:10.1039/d3ta06453k), 2024-01-01
Supplement: d3ta06453k1.pdf [file d3ta06453k1.pdf]

### Electronic supplementary information

for

### Enhanced PEMFC performance through high O<sub>2</sub> permeation and proton conductivity electrospun nanofiber electrodes with unique ionomer construction

Xue Zhang,<sup>a</sup> FANG LIU,<sup>a\*</sup> Xinjie Yuan,<sup>a</sup> Jing Shan,<sup>a</sup> Xiaoyan Wu,<sup>a</sup> Yalin Zhang,<sup>a</sup> Junning Wen,<sup>a</sup> and Zhongjun Hou<sup>a\*</sup>

<sup>a</sup>Shanghai Hydrogen Propulsion Technology Co. Ltd., 1788 Xiechun Road, Shanghai 201804, China.

\*Corresponding author: liu\_fang@shpt.com; hou\_zhongjun@shpt.com

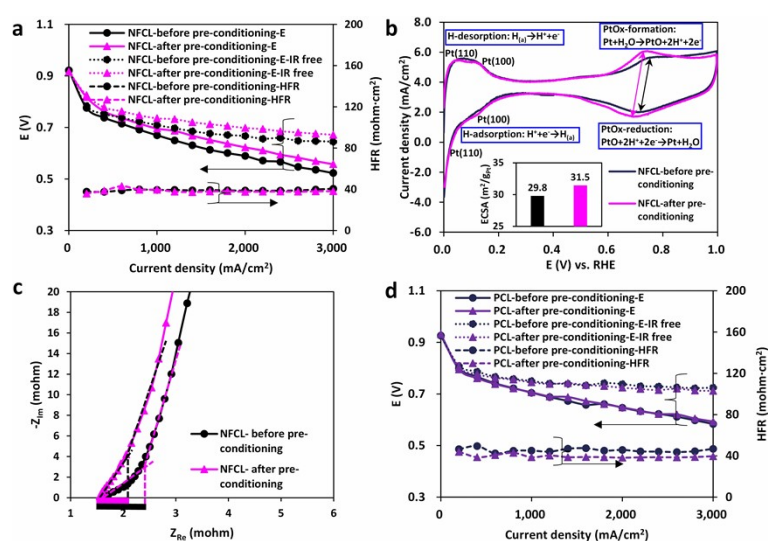

Fig. S1. H<sub>2</sub>/air fuel cell polarization data (a), CV results (b) and EIS (c) in H<sub>2</sub>/N<sub>2</sub> at 0.45 V with a 10-mV amplitude for 25 cm<sup>2</sup> NFCL electrodes at 80 °C and 100% RH of cathode and anode, respectively; (d) H<sub>2</sub>/air fuel cell polarization data for 25 cm<sup>2</sup> PCL electrodes at 80 °C and 100% RH of cathode and anode. The formation and reduction of PtO<sub>x</sub> is presented figuratively by the reactions including PtO; however, further oxide species such as PtOH or PtO<sub>2</sub> are present depending on the upper potential sweep limit and catalyst material. The insert in (b) is the ECSA of NFCL before and after pre-conditioning process. The Pt loadings of cathode and anode in this figure are 0.15 and 0.05 mg<sub>Pt</sub>/cm<sup>2</sup>, respectively.

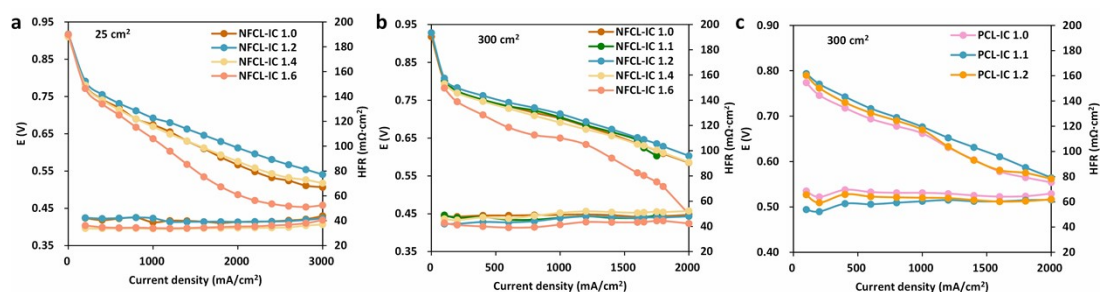

Fig. S2. (a) H<sub>2</sub>/air fuel cell performance comparison of 25 cm<sup>2</sup> NFCL electrode with various IC ratios after pre-conditioning method at 100% RH and 80 °C. H<sub>2</sub>/air fuel cell performance comparison of 300 cm<sup>2</sup> NFCL electrode after pre-conditioning method (b) and 300 cm<sup>2</sup> PCL electrode (c) with various IC ratios at 90 °C and 0% RH of cathode and 40% RH of anode. The Pt loadings of cathode and anode in (a-c) are 0.15 and 0.05 mg<sub>Pt</sub>/cm<sup>2</sup>, respectively.

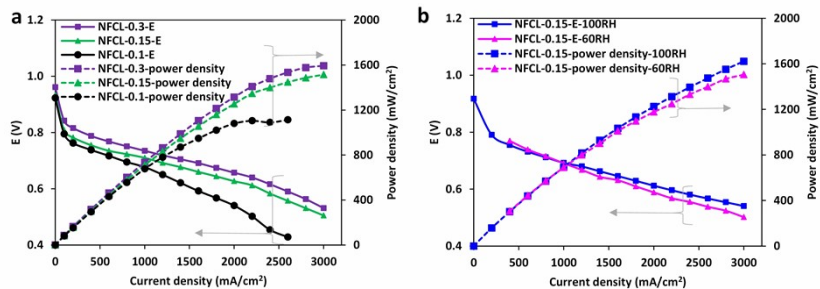

Fig. S3. (a) H<sub>2</sub>/air fuel cell polarization and power density data for 300 cm<sup>2</sup> NFCL electrode after pre-conditioning method at 0% RH of cathode and 40% RH of anode with cathode loading 0.1, 0.15 and 0.3 mg<sub>Pt</sub>/cm<sup>2</sup>. (b) H<sub>2</sub>/air fuel cell polarization and power density data for 25 cm<sup>2</sup> NFCL electrode after pre-conditioning method at 100% RH and 60% RH with cathode loading 0.15 mg<sub>Pt</sub>/cm<sup>2</sup>. The Pt loadings of anode in (a) and (b) are 0.05 mg<sub>Pt</sub>/cm<sup>2</sup>.

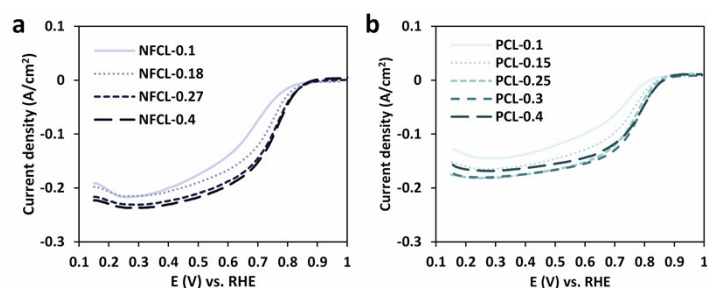

Fig. S4. LSV curves of limiting current density measurement in 1% O<sub>2</sub> in N<sub>2</sub> balance gases, at 80 °C, 150 kPa<sub>abs</sub>, and 90% RH with different Pt loadings of 2 cm<sup>2</sup> PCL and NFCL electrodes.

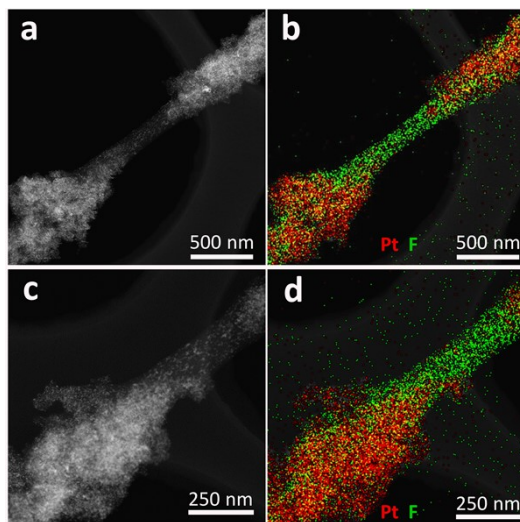

Fig. S5. STEM DF image showing nanofiber morphology (a, c). Overlays of DF image and EDS map of Pt-red, F-green (b, d). These images show the fiber positions connected by ionomer fibers in NFCL.

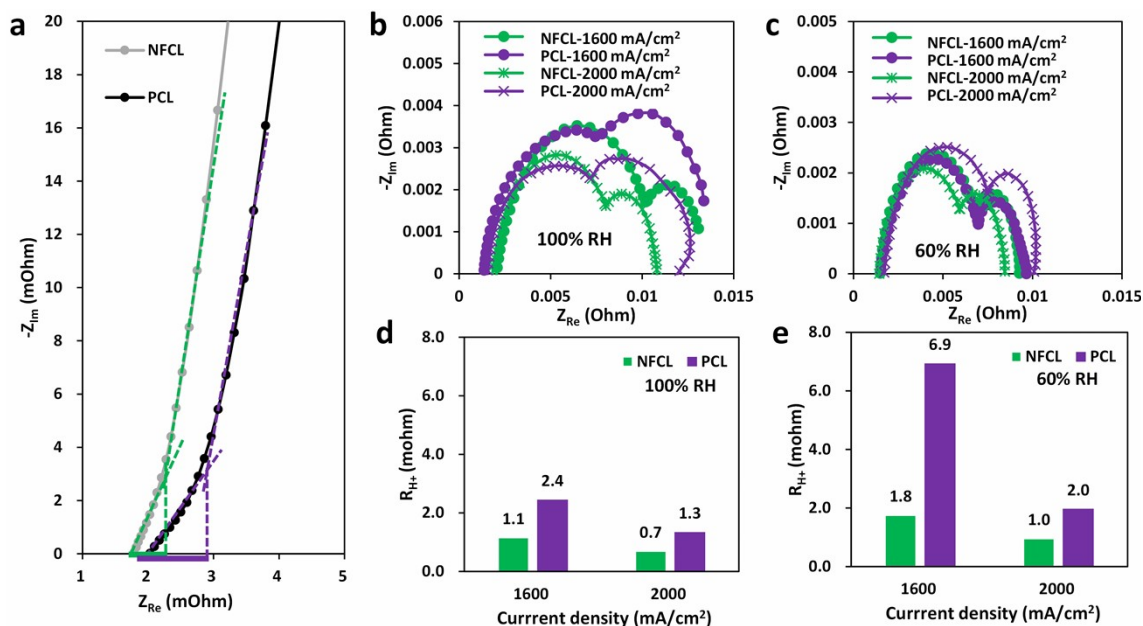

Fig. S6. (a) EIS of a 25 cm<sup>2</sup> MEAs with PCL and NFCL cathode in H<sub>2</sub>/N<sub>2</sub> at 0.45 V with a 10-mV amplitude, ex-situ proton transfer resistance,  $R_{H+}$  obtained from the green and purple solid lines. Nyquist plots at 1600 and 2000 mA/cm<sup>2</sup> of 25 cm<sup>2</sup> PCL and NFCL electrodes in H<sub>2</sub>/Air with 100% RH (b) and 60% RH (c), respectively. In-situ  $R_{H+}$  at 1600 and 2000 mA/cm<sup>2</sup> of PCL and NFCL electrodes obtained from EIS in H<sub>2</sub>/Air with 100% RH (d) and 60% RH (e), respectively. The Pt loadings of cathode and anode are 0.15 and 0.05 mg<sub>Pt</sub>/cm<sup>2</sup>, respectively.

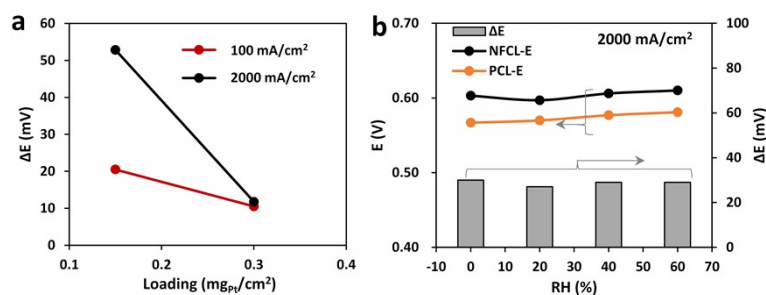

Fig. S7. (a) The voltage difference between NFCL and PCL electrodes at 100 and 2000 mA/cm<sup>2</sup> vs. two Pt loadings in 0% RH cathode. (b) The voltage of NFCL and PCL electrodes and the voltage difference between NFCL and PCL electrodes at 2000 mA/cm<sup>2</sup> vs. various RH. The anode Pt loading is 0.05 mg<sub>Pt</sub>/cm<sup>2</sup>, and the reactive area is 300 cm<sup>2</sup>.
